# Supplementary material for: School Teachers’ Self-Reported Fear and Risk Perception during the COVID-19 Pandemic—A Nationwide Survey in Germany
Source: MDPI journal article supplement (doi:10.3390/ijerph18179218), 2021-09-01
Supplement: s1 [file s1]

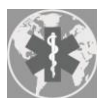

## Appendix – Questionnaire A1

### Survey SARS-CoV-2 Impfbereitschaft – Lehrerschaft (ImpfREAD)

Sehr geehrte Lehrerinnen, sehr geehrte Lehrer,

die COVID-19 Pandemie und die Frage nach dem Bedarf und der Dringlichkeit der Impfungen der verschiedenen Altersklassen und Berufe wird gesellschaftlich kontrovers diskutiert. Wir möchten Ihre Sicht und Meinung zur Dringlichkeit einer COVID-19 Impfung der Lehrerinnen und Lehrer an den verschiedenen Schulen erfragen. Im Rahmen dieser **bundesweiten Umfrage** wollen wir die **Impfbereitschaft und Meinung der Lehrerinnen und Lehrer** zur COVID-19-Impfung untersuchen. Dabei werden auch medizinische Parameter zur Einschätzung des Erkrankungs- und Komplikationsrisikos für COVID-19 und erfragt (Alter, Geschlecht, Vorerkrankungen). Die **Teilnahme** an dieser Umfrage erfolgt **anonym** und eine **Registrierung** ist für die Teilnahme **nicht erforderlich**.

Wir würden uns freuen, wenn Sie uns bei unserem Vorhaben unterstützen und alle Fragen beantworten. Gerne können Sie auch den Link zu dieser Umfrage an Ihre Kolleginnen und Kollegen weiterleiten.

Die Umfrage unterliegt den Regelungen der Datenschutzgesetzgebung. Alle Ihre Angaben werden anonym behandelt, d.h. es ist sichergestellt, dass Ihre Angaben nicht mit Ihrer Person in Verbindung gebracht werden können. Die Umfrage wird ca. 20 Minuten in Anspruch nehmen.

Ich möchte die Teilnehmerinformation lesen und mehr zum Datenschutz wissen.

Anhang:  [ImpfREAD Teilnehmerinformation.pdf](#) (0.22 MB)

Unter Bezugnahme auf die Teilnehmerinformation und Datenschutzerklärung (Datenschutzerklärung ist Teil der Teilnehmerinformation) willige ich ein, an der wissenschaftlichen Studie teilzunehmen.

Ja / Nein

Informieren Sie sich über COVID-19 und den Impfstoffen in dem anhängenden Dokument.

Anhang:  [COVID-19 Zusatzinformation.pdf](#) (0.05 MB)

**An welcher Schule unterrichten Sie?**

- Grundschule
- Hauptschule
- Realschule
- Gymnasium
- Gesamtschule
- Förderschule
- Waldorfschule
- Montessori Schule
- Internat
- Privatschule
- Sprachschule

**Bitte geben Sie Ihr Alter in Jahren an:**

Alter \_\_\_\_ Jahre

**Bitte geben Sie Ihr Geschlecht an:**

- weiblich
- männlich
- divers

**Ich befürchte mich an meinem Arbeitsplatz mit Corona zu infizieren.**

- Stimme ich völlig zu
- Stimme ich zu
- Stimme ich weder zu noch nicht zu
- Stimme ich nicht zu
- Stimme ich überhaupt nicht zu

**Wenn Sie zustimmen, durch wen fühlen Sie sich am meisten gefährdet? (Mehrfachnennung möglich)**

- Schüler
- Eltern
- Jüngere Kollegen (bis 55 Jahren)
- Ältere Kollegen (>55 Jahre)
- Weiß Nicht

**Wer ist Ihrer Meinung nach Überträger des Corona-Virus? (Mehrfachnennung möglich)**

- Alle Menschen
- Symptomatische Menschen

- Asymptomatische Menschen
- Kinder
- Jugendliche
- Junge Erwachsene (18-30 Jahren)
- Erwachsene im mittleren Alter (31- 65 Jahren)
- Ältere Erwachsene (älter als 65 Jahren)
- Nur die sogenannten „Superspreader“
- Weiß Nicht

**Kinder können den Corona Virus in sich tragen und übertragen ohne COVID-19 Symptome zu entwickeln. Ist dies für sie beängstigend?**

- Stimme ich völlig zu
- Stimme ich zu
- Stimme ich weder zu noch nicht zu
- Stimme ich nicht zu
- Stimme ich überhaupt nicht zu

**Sehen Sie sich als Gefahr den Schülern gegenüber oder gefährden die Schüler die Lehrer\*innen?**

- Schüler gefährden Lehrer\*innen
- Lehrer\*innen gefährden Schüler
- Eine Gefahr geht von beiden Seiten aus
- Eine hohe Gefahr besteht nur gegenüber älteren Lehrer\*innen (ab 60/65 Jahren)
- Weiß Nicht

**Glauben Sie, dass Schulen und Kitas in großem Maße zur Verbreitung des Virus beitragen?**

- Stimme ich völlig zu
- Stimme ich zu
- Stimme ich weder zu noch nicht zu
- Stimme ich nicht zu
- Stimme ich überhaupt nicht zu

**Glauben Sie, dass Kinder in großem Maße zur Verbreitung des Virus in Schulen und Kitas beitragen?**

- Stimme ich völlig zu
- Stimme ich zu
- Stimme ich weder zu noch nicht zu
- Stimme ich nicht zu
- Stimme ich überhaupt nicht zu

**Glauben Sie, dass Erzieher\*innen bzw. Lehrer\*innen in großem Maße zur Verbreitung des Virus in Schulen und Kitas beitragen?**

- Stimme ich völlig zu
- Stimme ich zu

- Stimme ich weder zu noch nicht zu
- Stimme ich nicht zu
- Stimme ich überhaupt nicht zu

**Ich mache mir grundsätzlich sehr viele Sorgen, dass ich mich mit Corona infiziere. Dieser Aussage:**

- Stimme ich völlig zu
- Stimme ich zu
- Stimme ich weder zu noch nicht zu
- Stimme ich nicht zu
- Stimme ich überhaupt nicht zu

**Meine Kollegen machen sich sehr viele Sorgen. Dieser Aussage:**

- Stimme ich völlig zu
- Stimme ich zu
- Stimme ich weder zu noch nicht zu
- Stimme ich nicht zu
- Stimme ich überhaupt nicht zu

**Meine Kollegen machen mich verrückt mit ihren Sorgen sich anzustecken. Dieser Aussage:**

- Stimme ich völlig zu
- Stimme ich zu
- Stimme ich weder zu noch nicht zu
- Stimme ich nicht zu
- Stimme ich überhaupt nicht zu

**Viele Eltern gehen zu unvorsichtig mit dem Thema Corona um. Dieser Aussage:**

- Stimme ich völlig zu
- Stimme ich zu
- Stimme ich weder zu noch nicht zu
- Stimme ich nicht zu
- Stimme ich überhaupt nicht zu

**Viele Eltern denken nur an sich und die Kinderbetreuung. Dieser Aussage:**

- Stimme ich völlig zu
- Stimme ich zu
- Stimme ich weder zu noch nicht zu
- Stimme ich nicht zu

- Stimme ich überhaupt nicht zu

**Ich beobachte, dass Ängste und Verhaltensweisen von den Eltern auf deren Kinder übertragen werden.**

- Stimme ich völlig zu
- Stimme ich zu
- Stimme ich weder zu noch nicht zu
- Stimme ich nicht zu
- Stimme ich überhaupt nicht zu

**Ich beobachte, dass sich Verhaltensweisen der Kinder während der Corona-Pandemie stark verändert haben.**

- Stimme ich völlig zu
- Stimme ich zu
- Stimme ich weder zu noch nicht zu
- Stimme ich nicht zu
- Stimme ich überhaupt nicht zu

**Die Vorgaben bezüglich der Umsetzung des Hygienekonzeptes des Bundeslandes setzen mich unter Druck.**

- Stimme ich völlig zu
- Stimme ich zu
- Stimme ich weder zu noch nicht zu
- Stimme ich nicht zu
- Stimme ich überhaupt nicht zu

**Die zusätzlichen Wünsche der Eltern bezüglich des Hygienekonzeptes setzen mich unter Druck.**

- Stimme ich völlig zu
- Stimme ich zu
- Stimme ich weder zu noch nicht zu
- Stimme ich nicht zu
- Stimme ich überhaupt nicht zu

**Ich gebe dem Drängen der Eltern bezüglich Extra-Hygienemaßnahmen (Gruppeneinteilungen, Desinfektionsspender aufstellen etc.)...**

- Stimme ich völlig zu
- Stimme ich zu
- Stimme ich weder zu noch nicht zu
- Stimme ich nicht zu
- Stimme ich überhaupt nicht zu

**Ich fühle mich den Erwartungen von Eltern und der Länder hinsichtlich der Umsetzung des Hygienekonzeptes bei kindgerechter Beschulung nicht gewachsen.**

- Stimme ich völlig zu
- Stimme ich zu

- Stimme ich weder zu noch nicht zu
- Stimme ich nicht zu
- Stimme ich überhaupt nicht zu

**Sind Sie bereits gegen COVID-19 geimpft?** (Falls ja, könnte man darauf hinweisen, dass die Fragen rückblickend beantwortet werden sollen ODER grundsätzlich nur nicht-geimpfte teilnehmen lassen?)

- Ja
- Nein

**Wenn ja, waren Sie zufrieden mit dem Impfverlauf?**

- Ja
- Nein

**Möchten Sie sich gegen COVID-19 impfen lassen?**

- Ja
- Nein
- Ich bin mir noch nicht sicher

**Wenn Sie die Wahl hätten, welchen Impfstoff würden Sie bevorzugen? (Mehrfachnennung möglich)**

- BioNTech/Pfizer (Comirnaty)
- Moderna
- AstraZeneca
- Sputnik V
- Johnson&Johnson
- Kann ich nicht beurteilen
- Egal

**Aus welchem Grund wollen Sie sich impfen lassen? (Mehrfachnennung möglich)**

- Zur eigenen Sicherheit, um gegen COVID-19 geschützt sein
- Um rasch an den Arbeitsplatz zurückkehren zu können
- Schutz für Familie und Freunde
- Schutz für die Schüler
- Schutz für Andere
- Impfpass für mehr Reisefreiheit
- Freiheiten in der Gestaltung der Freizeit
- Sonderrechte für Geimpfte
- Verringerung der Lockdown Maßnahmen
- Keinen Grund

**Aus welchem Grund wollen Sie sich NICHT impfen lassen? (Mehrfachnennung möglich)**

- Bereits durchgemachte COVID-19 Erkrankung und genesen
- Bedenken vor Impfreaktion und Nebenwirkungen

- Bedenken vor bisher unbekannten Langzeitfolgen
- Ich traue neuen Impfstoffen nicht
- Impfstoffe noch gar nicht richtig getestet
- Ich traue den Herstellern nicht
- Ich glaube nicht an die Erkrankung COVID-19
- Ich habe eine Vorerkrankung (Kontraindikation/erhöhtes Risiko durch die Impfung)
- Ich bin schwanger / Ich stille
- Keinen Grund

**Wenn Sie bezüglich der COVID-19 Impfung noch zögern, warum? (Mehrfachnennung möglich)**

- Ich zögere nicht
- Ich will nicht eine/r der Ersten sein. Die Daten zu den Nebenwirkungen sind noch zu unsicher
- Mein Zögern ist eher emotional als rational begründet
- Ich habe Zweifel, dass die Impfung unsere Situation tatsächlich verbessern wird
- Ich bin grundsätzlich skeptisch gegenüber Impfungen
- Mein Risiko für einen sehr schweren Verlauf einer COVID-19 Erkrankung erscheint mir sehr gering
- Das Risiko Nutzen Verhältnis ist mir zu gering
- Weiß nicht

**Würden Sie sich sofort gegen COVID-19 impfen lassen, wenn ausreichend Impfstoff vorhanden wäre?**

- Ja
- Nein
- Egal

**Ich fühle mich hinsichtlich einer COVID-19 Impfung ausreichend aufgeklärt.**

- Stimme völlig zu
- Stimme zu
- Stimme weder zu noch nicht zu
- Stimme nicht zu
- Stimme überhaupt nicht zu

**Ich wünsche mir eine COVID-19 Impfung aller Kollegen vor der Rückkehr zum Präsenzunterricht.**

- Stimme völlig zu
- Stimme zu
- Stimme weder zu noch nicht zu
- Stimme nicht zu
- Stimme überhaupt nicht zu

**Glauben Sie, dass durch die COVID-19 Impfung das Risiko der Übertragung einer Corona Infektion verringert wird?**

- Stimme völlig zu
- Stimme zu
- Stimme weder zu noch nicht zu
- Stimme nicht zu
- Stimme überhaupt nicht zu

**Verlangen Sie von der Forschung/Medizin/Politik eine Impfung, die eine Übertragung des Corona Virus verhindert?**

- Ja
- Nein
- Ist nicht möglich
- Weiß nicht

**Wie könnte man die Akzeptanz für eine COVID-19 Impfung erhöhen? (Mehrfachnennung möglich)**

- Aufklärung durch die Politik
- Aufklärung durch die Medien
- Aufklärung durch ärztliches Personal
- Aufklärung durch Angehörige/Freunde/Kollegen
- Weiß nicht

**Glauben Sie, dass die Corona-Krise durch die Herdenimmunität noch dieses Jahr beendet werden wird?**

- Sehr wahrscheinlich
- Eher wahrscheinlich
- Teils/teils
- Eher unwahrscheinlich
- Sehr unwahrscheinlich
- Weiß Nicht

**Ich halte eine priorisierte Vergabe des COVID-19 Impfstoffes für angemessen.**

- Stimme völlig zu
- Stimme zu
- Stimme weder zu noch nicht zu
- Stimme nicht zu
- Stimme überhaupt nicht zu

**Ich halte die neue Einteilung der Lehrer\*innen in Gruppe – 2 (Hohe Priorität) für gerechtfertigt.**

- Stimme völlig zu
- Stimme zu
- Stimme weder zu noch nicht zu
- Stimme nicht zu



- Stimme überhaupt nicht zu

**Welche Kategorie hielten Sie für Lehrer\*innen und Erzieher\*innen für angemessen?**

- Gruppe 1 – Höchste Priorität (=med. Personal mit hohem COVID-Kontakt)
- Gruppe 2 – Hohe Priorität (= med. Personal mit gelegentlichem COVID-Kontakt)
- Gruppe 3 – Erhöhte Priorität (Polizei)
- Gruppe 4 – Ohne Priorität
- Weiß nicht

**Denken Sie, dass die Öffnung der Schulen absolute Priorität hat?**

- Stimme völlig zu
- Stimme zu
- Stimme weder zu noch nicht zu
- Stimme nicht zu
- Stimme überhaupt nicht zu

**Welche Schulklassen sollten ihrer Meinung nach zuerst in den Präsenzunterricht zurückkehren?  
(Mehrfachnennung möglich)**

- Schulklassen 1-3
- Schulklassen 4-6
- Schulklassen 7-11
- Abschlussklassen
- Weiß Nicht

**Wie bewerten Sie die Sekundärschäden der Pandemie im Bildungsbereich?**

- Sehr hoch
- Hoch
- Mäßig
- Gering
- Sehr gering
- Weiß Nicht

**Durch die COVID-19 Impfung können die Kontaktbeschränkungen und die Maskenpflicht zeitnah aufgehoben werden. Dieser Aussage:**

- Stimme völlig zu
- Stimme zu
- Stimme weder zu noch nicht zu
- Stimme nicht zu
- Stimme überhaupt nicht zu

**Wie bewerten Sie die derzeitigen nicht-pharmakologischen Maßnahmen (Abstand + Hygiene + Alltag mit Maske + Warn-APP + Lüften Formel)?**

- Übertrieben
- Angemessen
- Zu gering
- Weiß nicht

**Wünschen Sie sich über die Corona Pandemie hinaus eine gesteigerte Hygiene der Menschen (z.B. gründliches Händewaschen)?**

- Ja
- Nein
- Weiß nicht

**Waren oder sind Sie an COVID-19 erkrankt?**

- Ja
- Nein

**Ich glaube, dass ich durch eine durchgemachte COVID-19 Erkrankung eine Immunität erhalten habe**

- Stimme völlig zu
- Stimme zu
- Stimme weder zu noch nicht zu
- Stimme nicht zu
- Stimme überhaupt nicht zu

**Wie oft lassen Sie sich auf eine Corona Infektion testen?**

- 1x wöchentlich
- 1x monatlich
- Situativ nach Gefährdungslage
- Noch nie

**Warum lassen Sie sich auf eine Corona Infektion hin testen? (Mehrfachnennung möglich)**

- Ich hatte Kontakt zu einer mit Corona infizierten Person
- Ich habe typische Symptome
- Aus Sorge vor eigener COVID-19 Erkrankung
- Vorsorglich um Angehörige zu schützen
- Vorsorglich um mein Umfeld zu schützen
- Weiß Nicht

**Wie schätzen Sie Ihr Risiko an COVID-19 zu erkranken ein?**

- Hoch
- Mäßig
- Gering
- Kein

**Wie schätzen Sie Ihr Risiko bei COVID-Erkrankung einen komplizierenden Verlauf zu erleiden?**

- Sehr gering
- Gering
- Mäßig
- Erhöht
- Hoch
- Sehr hoch

**Steigt Ihre Sorge sich mit Corona zu infizieren durch die Verknappung des Impfstoffes?**

- Ja
- Nein
- Weiß nicht

**Ich habe Sorge, dass durch die Überlastung des Gesundheitssystems die Möglichkeiten einen Arzt aufzusuchen begrenzt sind?**

- Stimme völlig zu
- Stimme zu
- Stimme weder zu noch nicht zu
- Stimme nicht zu
- Stimme überhaupt nicht zu

**Ich habe Sorge, dass durch die Überlastung des Gesundheitssystems die Möglichkeiten ein Krankenhaus und ggf. eine Intensivstation aufzusuchen begrenzt sind?**

- Stimme völlig zu
- Stimme zu
- Stimme weder zu noch nicht zu
- Stimme nicht zu
- Stimme überhaupt nicht zu

**Ich befürworte eine von der Politik diskutierte Impfpflicht gegen COVID-19.**

- Stimme völlig zu
- Stimme zu
- Stimme weder zu noch nicht zu

- Stimme nicht zu
- Stimme überhaupt nicht zu

**Generell bin ich für eine Impfpflicht (wie bei Masern auch für andere Infektionserkrankungen).**

- Stimme völlig zu
- Stimme zu
- Stimme weder zu noch nicht zu
- Stimme nicht zu
- Stimme überhaupt nicht zu

**Sehen Sie grundsätzlich Impfungen als Schutzmaßnahmen vor Krankheiten an?**

- Ja
- Nein
- Teilweise i. Sinne einer Risiko–Nutzen Abwägung
- Weiß nicht

**Wie lange liegt Ihre letzte Impfung zurück?**

- Ich habe mich in den letzten 4 Wochen impfen lassen
- Ich habe mich in den letzten 6 Monaten impfen lassen
- Ich habe mich im letzten 2 Jahren impfen lassen
- Ich habe mich in den letzten 5 Jahren impfen lassen
- Weiß nicht

**Lassen Sie regelmäßig überprüfen, ob Sie alle empfohlenen Impfungen erhalten haben?**

- Ja
- Nein

**Wünschen Sie sich regelmäßige Erinnerungen an Impftermine?**

- Ja
- Nein
- Weiß nicht

**Halten Sie die Empfehlungen der ständigen Impfkommision (STIKO) in D für**

- Angemessen
- Zu gering
- zu übertrieben
- Weiß nicht

**Halten Sie ‚Privilegien‘ für geimpfte Personen für angemessen?**

- Ja
- Ja, teilweise (z.B. Flugverkehr/Reisen)
- Nein
- Es handelt sich nicht um Privilegien, sondern um die Rückgabe der Grundrechte
- Weiß nicht

**Haben Sie sich in den letzten Jahren gegen Grippe (Influenza-Virus) impfen lassen?**

- Ja
- Nein

**Sehen Sie sich durch den Corona-Virus SARS-CoV-2 mehr gefährdet als durch den saisonalen Influenza Virus?**

- Stimme völlig zu
- Stimme zu
- Corona- und Influenza-Virus sind gleich gefährlich
- Stimme nicht zu
- Stimme überhaupt nicht zu
- Stimme weder zu noch nicht zu

**Die Grippewelle durch den Influenza Virus gefährdet auch jüngere Menschen, wo hingegen eher ältere Menschen schwer an COVID-19 erkranken. Dieser Aussage:**

- Stimme völlig zu
- Stimme zu
- Stimme weder zu noch nicht zu
- Stimme nicht zu
- Stimme überhaupt nicht zu

**Eher ältere Menschen sind durch die COVID-19 Erkrankung gefährdet. Dieser Aussage:**

- Stimme völlig zu
- Stimme zu
- Stimme weder zu noch nicht zu
- Stimme nicht zu
- Stimme überhaupt nicht zu

**Jüngere Menschen erkranken kaum schwer an COVID-19. Dieser Aussage:**

- Stimme völlig zu
- Stimme zu
- Stimme weder zu noch nicht zu
- Stimme nicht zu
- Stimme überhaupt nicht zu
-

**Ich kann mir vorstellen, dass auch COVID-19 durch Mutationen im Corona-Virus wie Influenza eine saisonale Erkrankung werden könnte.**

- Stimme völlig zu
- Stimme zu
- Stimme weder zu noch nicht zu
- Stimme nicht zu
- Stimme überhaupt nicht zu

**Meine Sorgen vor einer COVID-19 Erkrankung verstärken sich durch die neuen Corona-Mutationen.**

- Stimme völlig zu
- Stimme zu
- Stimme weder zu noch nicht zu
- Stimme nicht zu
- Stimme überhaupt nicht zu

**Man sollte gerade angesichts der schwer kalkulierbaren Gefahren durch neue Virusmutationen bei der Öffnung der Schulen vorsichtig vorgehen.**

- Stimme völlig zu
- Stimme zu
- Stimme weder zu noch nicht zu
- Stimme nicht zu
- Stimme überhaupt nicht zu

**Ich sehe die Gefahr, dass sich durch die Corona-Mutationen unbemerkt eine dritte Welle aufbaut.**

- Stimme völlig zu
- Stimme zu
- Stimme weder zu noch nicht zu
- Stimme nicht zu
- Stimme überhaupt nicht zu

**Halten Sie die Aussage: „Das Corona-Virus ist ein Vorwand, um die Menschen zu unterdrücken.“ für:**

- Sicher wahr
- Wahrscheinlich wahr
- Nicht wahr
- Weiß Nicht

**Halten Sie die Aussage: „Es gibt geheime Mächte, die die Welt steuern.“ für:**

- Sicher richtig
- Wahrscheinlich richtig
- Nicht richtig
- Weiß Nicht

**Man hört ja manchmal Meinungen, dass es bei den Maßnahmen gegen die Corona Pandemie um etwas ganz anderes geht als das was Politik und Medien sagen. Ist da ihrer Meinung nach etwas dran oder ist das ein unbegründeter Verdacht?**

- Ist etwas dran
- Unbegründeter Verdacht
- Unentschieden
- Weiß nicht

**Ich war schon gegen Corona-Maßnahmen demonstrieren. Dieser Aussage:**

- Stimme völlig zu
- Stimme zu
- Stimme weder zu noch nicht zu
- Stimme nicht zu
- Stimme überhaupt nicht zu

**Ich kann mir vorstellen zeitnah gegen Corona-Maßnahmen zu demonstrieren, wenn nicht bald großzügigere Lockerung in Kraft treten. Dieser Aussage:**

- Stimme völlig zu
- Stimme zu
- Stimme weder zu noch nicht zu
- Stimme nicht zu
- Stimme überhaupt nicht zu

**Ich denke es geschehen viele sehr wichtige Dinge in der Welt, über die die Öffentlichkeit nie informiert wird.**

- Sicher nicht
- Äußerst unwahrscheinlich
- Sehr unwahrscheinlich
- Unwahrscheinlich
- Eher unwahrscheinlich
- Unentschieden
- Eher wahrscheinlich
- Wahrscheinlich
- Sehr wahrscheinlich
- Äußerst wahrscheinlich
- Sicher (100%)

**Ich denke Politiker geben uns normalerweise keine Auskunft über die wahren Motive ihrer Entscheidungen.**

- Sicher nicht
- Äußerst unwahrscheinlich
- Sehr unwahrscheinlich
- Unwahrscheinlich
- Eher unwahrscheinlich
- Unentschieden
- Eher wahrscheinlich
- Wahrscheinlich
- Sehr wahrscheinlich
- Äußerst wahrscheinlich
- Sicher (100%)

**Ich denke Regierungsbehörden überwachen alle Bürger genau.**

- Sicher nicht
- Äußerst unwahrscheinlich
- Sehr unwahrscheinlich
- Unwahrscheinlich
- Eher unwahrscheinlich
- Unentschieden
- Eher wahrscheinlich
- Wahrscheinlich
- Sehr wahrscheinlich
- Äußerst wahrscheinlich
- Sicher (100%)

**Ich denke Ereignisse, die auf den ersten Blick nicht miteinander in Verbindung zu stehen scheinen, sind oft das Ergebnis geheimer Aktivitäten.**

- Sicher nicht
- Äußerst unwahrscheinlich
- Sehr unwahrscheinlich
- Unwahrscheinlich
- Eher unwahrscheinlich
- Unentschieden
- Eher wahrscheinlich
- Wahrscheinlich
- Sehr wahrscheinlich
- Äußerst wahrscheinlich



- Sicher (100%)

**Ich denke es gibt geheime Organisationen, die großen Einfluss auf politische Entscheidungen haben.**

- Sicher nicht
- Äußerst unwahrscheinlich
- Sehr unwahrscheinlich
- Unwahrscheinlich
- Eher unwahrscheinlich
- Unentschieden
- Eher wahrscheinlich
- Wahrscheinlich
- Sehr wahrscheinlich
- Äußerst wahrscheinlich
- Sicher

**Haben Sie Kinder?**

- Ja
- Nein

**Wie viele Kinder haben Sie?**

- 1 Kind
- 2 Kinder
- 3 und mehr Kinder

**Wie alt sind Ihre Kinder (Mehrfachnennung möglich)?**

- Kind bis 3 Jahre
- Kind bis 6 Jahre
- Kind bis 18 Jahre
- Volljährig

**Haben Sie Kinderbetreuung in Anspruch genommen?**

- Ja
- Nein

**Teilen Sie sich die Betreuungsarbeit?**

- Ja
- Wenn ja, betreuen die Großeltern mit?
- Nein

**Sind Sie alleinerziehend?**

- Ja
- Nein

**Bitte geben Sie Vorerkrankungen an, z.B. Diabetes mellitus, COPD, Bluthochdruck (Mehrfachnennung möglich)**

Freitext

**Bitte geben Sie die Postleitzahl Ihres Wohnortes an:**

\_\_\_\_\_

**Welche Altersstufen unterrichten Sie?**

- 1.-6. Klasse
- 7.-13. Klasse
- Alle Altersstufen

**Welche Fächer unterrichten Sie (Mehrfachnennung möglich)?**

- Deutsch
- Mathematik
- Naturwissenschaften
- Sachkunde
- Fremdsprachen
- Sport
- Musik
- Sonstige Fächer

**Fertig. Vielen Dank für Ihre Mitarbeit!**
